1            **Exceptional subgenome stability and functional divergence in allotetraploid teff, the**  
2                            **primary cereal crop in Ethiopia**

3  
4 Robert VanBuren<sup>1,2\*</sup>, Ching Man Wai<sup>1,2</sup>, Jeremy Pardo<sup>1,2,3</sup>, Alan E. Yocca<sup>3</sup>, Xuewen Wang<sup>4</sup>, Hao  
5 Wang<sup>4</sup>, Srinivasa R. Chaluvadi<sup>4</sup>, Doug Bryant<sup>5</sup>, Patrick P. Edger<sup>1</sup>, Jeffrey L. Bennetzen<sup>4</sup>, Todd  
6 C. Mockler<sup>5</sup>, Todd P. Michael<sup>6\*</sup>

7  
8 <sup>1</sup>Department of Horticulture, Michigan State University, East Lansing, MI 48824, USA

9 <sup>2</sup>Plant Resilience Institute, Michigan State University, East Lansing, MI 48824, USA

10 <sup>3</sup>Department of Plant Biology, Michigan State University, East Lansing, MI 48824, USA

11 <sup>4</sup>Department of Genetics, University of Georgia, Athens, GA 30602, USA

12 <sup>5</sup>Donald Danforth Plant Science Center, St. Louis, MO 63132, USA

13 <sup>6</sup>J. Craig Venter Institute, La Jolla, CA, 92037, USA

14 \*Corresponding authors: [bobvanburen@gmail.com](mailto:bobvanburen@gmail.com), [tmichael@jcvl.org](mailto:tmichael@jcvl.org)

15 **Abstract**

16 Teff (*Eragrostis tef*) is a cornerstone of food security in the Horn of Africa, where it is prized for  
17 stress resilience, grain nutrition, and market value. Despite its overall importance to small-scale  
18 farmers and communities in Africa, teff suffers from low production compared to other cereals  
19 because of limited intensive selection and molecular breeding. Here we report a chromosome-  
20 scale genome assembly of allotetraploid teff (variety ‘Dabbi’) and patterns of subgenome  
21 dynamics. The teff genome contains two complete sets of homoeologous chromosomes, with  
22 most genes maintained as syntenic gene pairs. Through analyzing the history of transposable  
23 element activity, we estimate the teff polyploidy event occurred ~1.1 million years ago (mya)  
24 and the two subgenomes diverged ~5.0 mya. Despite this divergence, we detected no large-scale  
25 structural rearrangements, homoeologous exchanges, or bias gene loss, contrasting most other  
26 allopolyploid plant systems. The exceptional subgenome stability observed in teff may enable  
27 the ubiquitous and recurrent polyploidy within Chloridoideae, possibly contributing to the  
28 increased resilience and diversification of these grasses. The two teff subgenomes have  
29 partitioned their ancestral functions based on divergent expression patterns among  
30 homoeologous gene pairs across a diverse expression atlas. The most striking differences in  
31 homoeolog expression bias are observed during seed development and under abiotic stress, and  
32 thus may be related to agronomic traits. Together these genomic resources will be useful for  
33 accelerating breeding efforts of this underutilized grain crop and for acquiring fundamental  
34 insights into polyploid genome evolution.

## 35 Introduction

36 Thirty crop species supply over 90% of the world's food needs and this narrow diversity reduces  
37 global food security. Humans have domesticated several hundred distinct plant species, but most  
38 are underutilized, under-improved, and restricted to their regions of origin <sup>1</sup>. Although food  
39 systems have become increasingly diverse in the last few decades, many locally adapted species  
40 have been replaced by calorically dense staple crops, resulting in global homogeneity <sup>2</sup>. Many  
41 underutilized and “orphan” crop species have desirable nutritional profiles, abiotic and biotic  
42 stress resilience, and untapped genetic potential for feeding the growing population under the  
43 changing climate.

44 Teff is the staple grain crop in Ethiopia, and it is preferred over other cereals because of  
45 its nutritional profile, low input demand, adaptability, and cultural significance. Unlike other  
46 major cereals, teff is grown primarily by small-scale, subsistence farmers. An estimated 130,000  
47 locally adapted cultivars have been developed. Teff is among the most resilient cereals,  
48 tolerating marginal and semi-arid soils that are unsuitable for wheat, maize, sorghum, and rice  
49 production. Teff was likely domesticated in the northern Ethiopian Highlands where much of the  
50 genetic diversity can be found <sup>3-5</sup>. Consistent yields of small, nutritious seeds were the primary  
51 domestication targets of teff, contrasting most cereals where large seed heads and high  
52 productivity under tillage were desirable <sup>5</sup>. Despite its stress tolerance, yield improvements lag  
53 behind other cereals because of issues related to lodging, seed shattering, extreme drought, and  
54 poor agronomic practices <sup>6</sup>. Teff and other orphan cereals have undergone limited intensive  
55 selection for high productivity under ideal conditions, and rapid gains should be possible with  
56 advanced breeding and genome selection. A draft genome is available for the teff cultivar  
57 ‘Tsedey’ (DZ-Cr-37) <sup>7</sup>, but the utility of this reference is limited given its fragmented and  
58 incomplete nature.

59 The wild progenitor of teff is likely *Eragrostis pilosa*; a hardy wild grass sharing  
60 considerable overlap in morphological, genetic, and karyotype traits with teff <sup>8,9</sup>. *E. tef* and *E.*  
61 *pilosa* are allotetraploids that arose from a shared polyploidy event of merging two distant,  
62 unknown diploid genomes <sup>9</sup>. Many crop plants are polyploid, and genome doubling can give rise  
63 to emergent traits such as spinnable fibers in cotton <sup>10</sup>, morphological diversity in *Brassica* sp. <sup>11</sup>,  
64 and new aromatic profiles of strawberry fruits <sup>12</sup>. Successful establishment of allopolyploids  
65 requires coordination of two distinct sets of homoeologous genes and networks, and often a  
66 ‘dominant’ subgenome emerges to resolve genetic and epigenetic conflicts <sup>13-15</sup>. The effect of  
67 polyploidy on desirable traits and interactions between the two subgenomes remains untested in  
68 teff. Polyploidy is found in more than 90% of species within the grass subfamily containing teff  
69 (Chloridoideae), and this has been hypothesized to contribute to the stress tolerance and  
70 diversification of these grasses <sup>16</sup>. Here, we report a chromosome-scale assembly of the teff A  
71 and B subgenomes and test for patterns of subgenome interactions and divergence.

72

## 73 Results

74 *Genome assembly and annotation*

75 We built a chromosome-scale assembly of the allotetraploid teff genome using a combination of  
76 long read SMRT sequencing and long-range high-throughput chromatin capture (Hi-C). In total,  
77 we generated 5.5 million filtered PacBio reads collectively spanning 52.9 Gb or 85x coverage of  
78 the estimated 622 Mb ‘Dabbi’ teff genome. PacBio reads were error corrected and assembled  
79 using Canu<sup>17</sup> and the resulting contigs were polished to remove residual errors with Pilon<sup>18</sup> using  
80 high coverage Illumina data (45x). The PacBio assembly has a contig N50 of 1.55 Mb across  
81 1,344 contigs with a total assembly size of 576 Mb; 92.6% of the estimated genome size. The  
82 graph-based structure of the assembly has few bubbles corresponding to heterozygous regions  
83 between haplotypes but contains numerous ambiguities related to high copy number long  
84 terminal repeat (LTR) retrotransposons (Supplemental Figure 1). This pattern was also observed  
85 in the genome assembly graph of the closely related grass, *Oropetium thomaeum*<sup>19</sup>. The average  
86 nucleotide identity between homoeologous regions in teff is 93.9% in protein coding regions.  
87 Thus, high sequence divergence facilitated accurate phasing and assembly. We utilized twenty  
88 random fosmids to assess the accuracy of the PacBio-based assembly (Supplemental Table 1).  
89 The fosmids collectively span 351kb and have an average identity of 99.9% to the teff genome  
90 with individual fosmids ranging from 99.3 to 100%. This suggests that our assembly is mostly  
91 complete and accurately polished.

92 Contigs from the Canu based draft genome were anchored into a chromosome-scale  
93 assembly using a Hi-C based scaffolding approach. Illumina reads from the Hi-C library were  
94 aligned to the PacBio contigs with BWA<sup>20</sup> followed by proximity based clustering using the  
95 Juicer pipeline<sup>21</sup>. 150bp paired-end reads and aggressive filtering of non-uniquely mapped reads  
96 were used to minimize chimeric mapping errors between homoeologous regions. After filtering,  
97 twenty high-confidence clusters were identified, consistent with the haploid chromosome  
98 number of teff (2n=40; Figure 1). In total, 687 contigs collectively spanning 96% of the  
99 assembly (555 Mb) were anchored and oriented across the 20 pseudomolecules (Table 1).  
100 Pseudomolecules ranged in size from 19 to 40 Mb, consistent with the teff karyotype<sup>22</sup>. Seven  
101 chimeric contigs corresponding to joined telomeres were identified and split based on Hi-C  
102 interactions. As described in the accompanying manuscript (see Wang et al. 2019), this genome  
103 assembly was compared to a detailed genetic map of teff to revise and confirm chromosome-  
104 scale assemblies for all 20 teff chromosomes, thus providing the opportunity to discover the A  
105 and B genomes from the diploid progenitors of this allotetraploid (see below).

106 The teff genome was annotated using the MAKER pipeline. Transcript support from a  
107 large-scale expression atlas and protein homology to Arabidopsis and other grass genomes were  
108 used as evidence for *ab initio* gene prediction. After filtering transposon-derived sequences, *ab*  
109 *initio* gene prediction identified 68,255 gene models. We assessed the annotation quality using  
110 the Benchmarking Universal Single-Copy Ortholog (BUSCO) Embryophyta dataset. The  
111 annotation contains 98.1% of the 1,440 core Embryophyta genes and the majority (1,210) are  
112 found in duplicate in the A and B subgenomes.

113 The teff cultivar ‘Tsedey’ (DZ-Cr-37) was previously sequenced using an Illumina based  
114 approach, yielding a highly fragmented draft genome with 14,057 scaffolds and 50,006 gene  
115 models<sup>7</sup>. The fragmented nature of this assembly and incomplete annotation hinders

116 downstream functional genomics, genetics, and marker-assisted breeding of teff. We compared  
117 the ‘Tsedey’ assembly with our ‘Dabbi’ reference to identify cultivar-specific genes and  
118 differences in assembly quality. Only 30,424 (60.8%) of the ‘Tsedey’ gene models had  
119 homology (>95% sequence identity) to gene models in our ‘Dabbi’ reference, including 9,866  
120 homoeologous gene pairs. Only 20,208 (29.6%) of our ‘Dabbi’ gene models had homology to  
121 ‘Tsedey’ gene models. The remaining gene models were unannotated or unassembled in the  
122 ‘Tsedey’ assembly. Only one-third of the ‘Tsedey’ genome is assembled into scaffolds large  
123 enough to be classified as syntenic blocks to ‘Dabbi’, which is an unavoidable artifact of the poor  
124 assembly quality and low contiguity. Because of the fragmented nature of the ‘Tsedey’  
125 assembly, we were unable to identify lineage-specific genes. Hence, the genomic resources  
126 presented here represent a significant advance over previous efforts.

127

### 128 *Origins and subgenome dynamics*

129 Teff is an allotetraploid with unknown diploid progenitors, but the polyploidy event is  
130 likely shared with other closely related *Eragrostis* species<sup>9</sup>. Because the diploid progenitors are  
131 unknown and possibly extinct, we utilized the centromeric array sequences to distinguish the  
132 homoeologous chromosomes from the A and B subgenomes of teff. Centromeric (CenT) repeat  
133 arrays in teff range from 3.7 kb to 326 kb in size for each chromosome and individual arrays  
134 contain 22 to 824 copies (Supplemental Table 2). We identified two distinct CenT arrays in teff  
135 (hereon referend to as CenTA and CenTB). CenTA and CenTB are the same length (159 bp) but  
136 have different sequence composition (Supplemental Figure 2b). Alignment of the consensus  
137 CenT arrays identified several distinguishing polymorphisms and a maximum likelihood  
138 phylogenetic tree separated the CenT arrays into two well-supported clades (Supplemental  
139 Figure 2a). Each clade contains one member from each of the ten homoeologous chromosome  
140 pairs and this classification likely represents differences in Cen array composition between the  
141 diploid progenitor species. This approach allowed us to accurately distinguish homoeologous  
142 chromosome pairs from the A and B subgenomes and verifies the allopolyploid origin of teff.

143 The Teff subgenomes have 93.9% sequence homology in the coding regions, suggesting  
144 that either the polyploidy event was relatively ancient or that the progenitor diploid species were  
145 highly divergent<sup>23</sup>. To estimate the divergence time of the A and B subgenomes, we calculated  
146 Ks (synonymous substitutions per synonymous site) between homoeologous gene pairs. Teff  
147 homoeologs have a single Ks peak with a median of 0.15 (Supplemental Figure 3),  
148 corresponding to a divergence time of ~5 million years based on a widely used mutation rate for  
149 grasses<sup>24</sup>. The ten pairs of homoeologous chromosomes are highly syntenic with no large-scale  
150 structural rearrangements. The A subgenome is 13% (37 Mb) larger in size but contains only 5%  
151 more genes than the B subgenome (34,032 vs. 32,255; Table 1). Most genes (54,846) are  
152 maintained as homoeologous pairs and 13,409 are found in only one subgenome. We identified  
153 6,876 tandemly duplicated genes with array sizes ranging from 2 to 15 copies. Of the 2,748  
154 tandem arrays, 998 are found in both subgenomes, while 864 and 1,008 occur in only the A and  
155 B subgenomes, respectively (Table 1). Copy number varies extensively in shared arrays between  
156 the subgenomes.

157 The monoploid genome size of teff is relatively small (~300 Mb) compared to other  
158 polyploid grasses, and repetitive elements constitute a low percentage (25.6%) of the genome.  
159 Long terminal repeat retrotransposons (LTR-RTs) are the most abundant repetitive elements,  
160 spanning at least 115.9 Mb or ~20.0% of the genome (Supplemental Table 3). This predicted  
161 percentage is somewhat lower than that reported for other small grass genomes such as  
162 *Oropetium* (250 Mb; 27%)<sup>19,25</sup> and *Brachypodium* (272 Mb; 21.4%)<sup>26</sup>. We classified LTRs into  
163 families and compared their abundance and insertion times (Figure 2). A particular window of  
164 activity was seen for six families of LTR-RTs that were active only in the A genome progenitor  
165 or the B genome progenitor (Supplemental Figure 4, Supplemental Table 4). The insertion times  
166 for these genome-specific LTR-RTs were all greater than 1.1 mya, indicating the two  
167 subgenomes were evolving independently during this period. Hence, this LTR-RT analysis both  
168 confirms the A and B genome designations, and provides a novel methodology for determining  
169 the date of polyploid formation. In teff, these data indicate that the ancestral polyploidy was  
170 established ~1.1 mya.

171 Five of the six subgenome-specific LTR-RT families were found only in the A  
172 subgenome, suggesting that LTR-RTs accumulate more rapidly in the A subgenome or are  
173 purged more effectively in the B subgenome. This recent bursts of LTR-RT activity contributes  
174 to the 13% larger size of the A subgenome. There are 24 families with median insertion times  
175 between 1.1 and 2.4 MYA, and the remaining 18 families do not exhibit subgenomic specificity.  
176 Of these, 15 show no apparent burst in amplification, and three evidence of very recent (post-  
177 polyploid) activity (Figure 4, Supplementary Figure 4, Supplemental Table 5).

178 Teff belongs to the Chloridoideae subfamily of grasses<sup>27</sup> which includes important  
179 drought and heat tolerant C4 species such as the orphan grain crop finger millet and model  
180 desiccation tolerant plants in the genera *Oropetium*, *Eragrostis*, *Tripogon*, *Sporobolus*, and  
181 others. Most (~90%) of surveyed Chloridoideae species are polyploid, including many of the  
182 aforementioned taxa, and this likely contributes to their diversity and stress tolerance<sup>16</sup>. We  
183 utilized the wealth of genomic resources within Chloridoideae and more generally across  
184 Poaceae to identify patterns associated with improved stress tolerance, polyploidy and genome  
185 evolution in teff. The teff and *Oropetium* genomes have near complete collinearity, as  
186 demonstrated by highly conserved gene content and order along each chromosome (Figure 3).  
187 Teff and *Oropetium* show a clear 1:2 synteny pattern with 87% of teff genes having synteny to  
188 one block in *Oropetium* and 85% of *Oropetium* genes having synteny to two blocks in the teff  
189 genome (Figure 3a). This ratio corresponds to the A and B homoeologs of tetraploid teff and the  
190 single orthologs of diploid *Oropetium*. Each *Oropetium* chromosome has clear collinearity to  
191 two homoeologous teff chromosomes (Figure 3c). Three trios have no rearrangements (teff 3A,  
192 3B, and *Oropetium* Chr3; 4A, 4B, Chr4; 6A, 6B, Chr8) six trios have one or more large-scale  
193 inversions (1A, 1B, Chr1; 2A, 2B, Chr2; 5A, 5B, Chr7; 7A, 7B, Chr6; 8A, 8B, Chr9; 9A, 9B,  
194 Chr5) and one trio has translocations (10A, 10B, Chr10). Of the 28,909 *Oropetium* genes, 74%  
195 (21,293) have syntenic orthologs in both subgenomes of teff, 5% (1,503) are found in only one  
196 subgenome, and 21% (6,113) have no syntenic orthologs in teff. Teff and the allotetraploid grain  
197 crop finger millet have 2:2 synteny but only 69% of syntenic blocks are found in duplicate  
198 because of the fragmented nature of the finger millet genome assembly<sup>28</sup> (Supplemental Figure



199 5). Only 56% (38,149) of the teff genes have two syntenic orthologs in finger millet and the  
200 remaining 13 and 30% (9,228 and 20,878) have one or zero syntenic orthologs in finger millet  
201 respectively.

202 Using Oropetium and teff syntenic orthologs, we calculated the ratio of nonsynonymous  
203 (Ka) to synonymous substitutions (Ks) to identify genes putatively under selection during  
204 domestication in teff. The top 10% of genes with the highest Ka/Ks ratios in teff (cutoff of 0.38)  
205 are enriched in gene ontology (GO) terms related to somatic embryogenesis, pollen  
206 differentiation, and reproductive phase transition among others (Supplemental Table 6). These  
207 genes may have been intentional or inadvertent targets during domestication.

208 Following an allopolyploidy event, a dominant subgenome often emerges with  
209 significantly more retained genes and higher homoeolog expression as the plant returns to a  
210 diploid-like state<sup>13</sup>. This dominance is established immediately following the polyploidy event  
211<sup>15</sup>, and patterns of biased fractionation have been observed in *Arabidopsis*<sup>13</sup>, maize<sup>29</sup>, *Brassica*  
212 *rapa*<sup>30</sup>, and bread wheat<sup>31</sup>. Biased homoeolog loss (fractionation) is not universal, and other  
213 allopolyploids such as *Capsella bursa-pastoris*<sup>32</sup> and several *Cucurbita* species<sup>33</sup> display no  
214 subgenome dominance. We searched for biased fractionation using syntenic orthologs from  
215 Oropetium as anchors. The A and B subgenomes of teff have a near identical number of syntenic  
216 orthologs to Oropetium (19,277 vs. 19,292 respectively) suggesting that there is little or no  
217 biased fractionation in teff. Orthologs to 1,308 Oropetium genes are found as single copy loci in  
218 teff, including 647 and 678 from the A and B subgenomes respectively. The remaining  
219 orthologs are maintained in duplicate in teff compared to their single ortholog in Oropetium.  
220 Together this suggests a general stability of gene content in *Eragrostis* after genome merger.

221

## 222 *Homoeolog expression patterns and subgenome dominance*

223 To test for patterns of sub-genome differentiation and dominance in teff, we surveyed  
224 gene expression in eight developmentally distinct tissue types and two stages of progressive  
225 drought stress. Sampled tissues include roots and shoots from seedlings and mature plants,  
226 internodes, and two stages of developing seeds. Tissue from mature, well-watered leaves and two  
227 time points of severe drought were also collected (leaf relative water content of 33% and 16%  
228 respectively). Of the 23,303 syntenic gene pairs between the A and B subgenome, 15,325 have  
229 homoeologous expression bias (HEB) in at least one tissue and 1,694 have biased expression in  
230 all sampled tissues (Supplemental Figure 6). Pairwise comparisons between syntenic gene pairs  
231 support a slight bias in transcript expression toward the B subgenome (Figure 4a). Roughly 56%  
232 of the 207,873 pairwise comparisons across the ten tissues show biased expression toward  
233 homoeologs in the B subgenome (Wilcoxon rank sum  $P < 0.001$ ). This pattern is consistently  
234 observed across all ten tissues and most chromosome pairs, but the difference is subtle when  
235 robust cutoffs of differential expression are applied (Figure 4b and c; see methods). Individual  
236 tissues have from 6,061 to 8,485 homoeologous gene pairs with significant differential  
237 expression, including 52.3% biased toward the B subgenome (Kruskal–Wallis H test  $P < 0.01$ ;  
238 Figure 4b). Eight pairs of chromosomes show HEB toward the B subgenome, and chromosomes

239 1 and 8 have more dominant homoeologs from the A subgenome, but the difference is not  
240 significant (Wilcoxon rank sum  $P > 0.05$ ). Together this suggests that the B subgenome is  
241 universally dominant over the A subgenome but when strict thresholds are applied, this  
242 difference is minimal. Although we detected no evidence of recent homoeologous exchange, it is  
243 possible that genes from the recessive genome were replaced with homoeologs from the  
244 dominant subgenome, which would weaken patterns of subgenome dominance<sup>34</sup>.

245 We tested whether gene pairs with HEB maintain patterns of dominance across all tissues  
246 or whether dominant homoeologs are reversed in different tissues or under stress. The vast  
247 majority of genes (86.9%; 13,322) with homoeologous expression bias maintain the same pattern  
248 of dominance across all tissues, while 13.1% (2,002) of gene pairs have opposite dominance  
249 patterns in different tissues. The remaining 7,675 gene pairs have no expression bias in any  
250 tissues or both homoeologs have negligible expression. Severely dehydrated leaf tissue had the  
251 most gene pairs with HEB (36%; 8,485) compared to seedling roots and shoots which each had  
252 ~26% of pairs with HEB. These results are consistent with previous findings in allohexaploid  
253 wheat<sup>35</sup> and allotetraploid *Tragopogon mirus*<sup>36</sup>. We compared the ratio of nonsynonymous (Ka)  
254 to synonymous substitution rates (Ks) in homoeologous gene pairs to test if genes with stronger  
255 HEB are experiencing different patterns of selection. Gene pairs with stronger HEB had  
256 significantly higher Ka/Ks than gene pairs with no HEB in any tissue (Supplemental Figure 7;  
257 0.17 vs. 0.28; Mann-Whitney  $P < 0.01$ ). We detected no difference in divergence (Ks) among  
258 genes with varying degrees of HEB (Supplemental Figure 8). This suggests homoeologous gene  
259 pairs with higher expression divergence are under more relaxed selective constraints than gene  
260 pairs with balanced expression.

261

## 262 Discussion

263 Unlike the genomes of most polyploid grasses, the teff subgenomes are relatively small (~300  
264 Mb), with high gene density and low transposable element content. The subgenomes are highly  
265 syntenic along their length with no evidence of major inversions or structural rearrangements,  
266 contrasting patterns observed in other similarly aged allopolyploids such as wheat<sup>37</sup>, canola  
267 (*Brassica napus*)<sup>38</sup>, strawberry (*Fragaria ananassa*)<sup>39</sup>, cotton<sup>40</sup>, and proso millet<sup>41</sup>. The  
268 general stability of the teff subgenomes may be attributed to low rates of homoeologous  
269 exchange. An estimated 90% of Chloridoid grasses are polyploid and among the allopolyploid  
270 species, multivalent pairing is rarely detected<sup>16</sup>. The twenty chromosome pairs in teff show  
271 bivalent pairing in meiosis I<sup>22</sup>, and double reduction has not been observed in segregating  
272 populations<sup>42,43</sup>. Although homoeologous exchanges can result in advantageous emergent  
273 phenotypes, they can also destabilize the karyotype, leading to reduced fertility and fitness<sup>44</sup>. For  
274 this reason, recent polyploids have long been considered “evolutionary dead ends”<sup>45</sup>. Thus,  
275 proper bivalent pairing (disomic inheritance) in natural allopolyploids may be favored, and the  
276 near perfect synteny observed between teff subgenomes suggests that an underlying mechanism  
277 may exist to prevent or reduce homoeologous exchanges in this species. We detected no  
278 evidence of recent homoeologous exchange in teff based on Ks distribution, including exchanges  
279 that would have happened at the inception of the polyploidy event 1.1 mya. Homeologous

280 exchanges are a common feature of allopolyploids <sup>34</sup>, and the lack of these events is a unique  
281 feature of the teff genome.

282 The Teff A and B subgenomes, and *Oropetium genome* have high degrees of  
283 chromosome level collinearity despite their distant divergence. This is particularly unusual as  
284 polyploidy-rich lineages typically have high rates of chromosome evolution <sup>46</sup>. In contrast, our  
285 analysis of the divergence dates of the diploid A and B genome ancestors (~5 mya) and the  
286 formation of the tetraploid (~1.1 mya) indicates that the two genomes were so similar in structure  
287 (i.e., gene content, gene order and chromosome size) that some tetrasomic pairing would have  
288 been expected. Perhaps the status of the *PhI*-equivalent locus (loci) <sup>47</sup> in *Eragrostis* is (are) so  
289 dominant, that even low frequencies of homoeologous pairing are blocked. The high levels of  
290 subgenome compatibility, genetic and chromosome stability, fidelity for chromosome pairing,  
291 and low rates of homoeologous exchange allows polyploidy to dominate in the Chloridoideae  
292 subfamily. This polyploidy in turn may have enabled the emergent resilience and robustness  
293 observed in Chloridoid grasses.

294 Although we detected no biased fractionation between the teff subgenomes, we observed  
295 a general subgenome dominance across tissues in the expression atlas. The B subgenome is  
296 smaller and has fewer transposable elements, which may be contributing to the overall higher  
297 homoeolog expression levels <sup>15</sup>. Patterns of B subgenome dominance are relatively weak  
298 compared to other allopolyploids <sup>15</sup>, which may reflect the stability and lack of biased  
299 fractionation in teff. The teff subgenomes have successfully partitioned their ancestral roles, and  
300 most gene pairs display homoeolog expression bias. This bias is generally maintained across  
301 tissues and treatments, and few gene pairs change bias in a tissue-specific manner. Severely  
302 drought stressed leaf tissue has the highest proportion of genes with biased expression, which  
303 may reflect adaptation to adverse environments. Extensive homoeolog expression bias is also  
304 observed in hexaploid wheat <sup>35</sup>, octoploid sugarcane <sup>48</sup>, and tetraploid *Tragopogon mirus* <sup>36</sup> and  
305 may be a common feature of recent polyploid grasses.

306 The vast majority of genes in Teff are maintained as homoeologous gene pairs in the A  
307 and B subgenomes, providing a significant obstacle for targeted breeding. Efforts to produce  
308 semi-dwarf, lodging resistant teff using a mutagenesis approach have been more difficult  
309 because of gene redundancy <sup>49</sup>. The resources provided here will help accelerate marker-assisted  
310 selection and guide genome engineering-based approaches, which must take gene redundancy  
311 into account. Most gene pairs have divergent expression profiles such that the subgenomes likely  
312 contribute unequally to different agronomic traits. Teff is often described as an orphan grain crop  
313 because of its limited investigation and improvement, resulting in relatively low yields under  
314 ideal conditions compared to other cereals with intensive selection and breeding histories. Teff  
315 and other grasses within Chloridoideae have high tolerance to abiotic stresses, and most of this  
316 resilience was maintained during teff domestication. This may represent a historical alternative  
317 selection scheme where maximum yield is exchanged for reliable harvest under poor  
318 environmental conditions. Future efforts to improve food security should utilize the natural  
319 resilience of these robust, stable, polyploid species.

320



## 321 **Methods**

### 322 *Plant materials*

323 The ‘Dabbi’ cultivar of teff (PI 524434, [www.ars-grin.gov](http://www.ars-grin.gov)) was chosen for sequencing and for  
324 constructing the expression atlas. Plant materials for High molecular weight (HMW) genomic  
325 DNA extraction, Hi-C library construction and RNA were maintained in growth chambers under  
326 a 12-hour photoperiod with day/night temperatures of 28°C and 22°C respectively and a light  
327 intensity of 400  $\mu\text{E m}^{-2} \text{sec}^{-1}$ . Tissue samples for the expression atlas were collected at ZT8  
328 (Zeitgeber Time 8) to reduce issues associated with circadian oscillation. The tissue types used in  
329 the expression atlas include shoots and roots from young seedlings, mature leaf, internode, root,  
330 immature seeds and mature seeds. For the drought time points, mature teff plants were allowed  
331 to dry slowly and leaf tissue was collected at subsequent days of extreme drought when the plant  
332 tissues had 33% and 16% relative water content, as well as well-watered teff for comparison.  
333 Three biological replicates were collected for each sample in the expression atlas. Leaf tissue  
334 from seedlings was used for the HMW genomic DNA extraction and Hi-C library construction.  
335 Tissues for HMW genomic DNA extraction and RNaseq were immediately frozen in liquid  
336 nitrogen and stored at -80° C.

337

### 338 *DNA isolation, library construction, and sequencing*

339 HMW genomic DNA was isolated from young teff leaf tissue for both PacBio and Illumina  
340 sequencing. A modified nuclei preparation<sup>50</sup> was used to extract HMW gDNA and residual  
341 contaminants were removed using phenol chloroform purification. PacBio libraries were  
342 constructed using the manufacturer’s protocol and were size selected for 30 kb fragments on the  
343 BluePippen system (Sage Science) followed by subsequent purification using AMPure XP beads  
344 (Beckman Coulter). The PacBio libraries were sequenced on a PacBio RSII system with P6C4  
345 chemistry. In total, 5.5 million filtered PacBio reads were generated, collectively spanning 52.9  
346 Gb or ~85x genome coverage (assuming a genome size of 622 Mb). The same batch of HMW  
347 genomic DNA was used to construct Illumina DNaseq libraries for correcting residual errors in  
348 the PacBio assembly. Libraries were constructed using the KAPA HyperPrep Kit (Kapa  
349 Biosystems) followed by sequencing on an Illumina HiSeq4000 under paired-end mode (150  
350 bp).

351

### 352 *RNA extraction and library construction*

353 RNA for the expression atlas was extracted using the Omega Biotek E.Z.N.A. ® Plant RNA kit  
354 according to the manufacturer’s protocol. Roughly 200 mg of ground tissue was used for each  
355 extraction. The RNA quality was validated using gel electrophoresis and the Qubit RNA IQ  
356 Assay (ThermoFisher). Stranded RNaseq libraries were constructed using 2 $\mu\text{g}$  of total RNA  
357 quantified using the Qubit RNA HS assay kit (Invitrogen, USA) with the Illumina TruSeq  
358 stranded total RNA LT sample prep kit (RS-122-2401 and RS-122-2402). Multiplexed libraries

359 were pooled and sequenced on an Illumina HiSeq4000 under paired-end 150nt mode. Three  
360 replicates were sequenced for each timepoint/sample.

361

### 362 *Genome assembly*

363 The genome size of ‘Dabbi’ teff was estimated using flow cytometry as previously described<sup>51</sup>.  
364 The estimated flow cytometry size was 622 Mb, which was consistent with kmer-based  
365 estimations from Illumina data. The kmer plot had a unimodal distribution suggesting low within  
366 genome heterozygosity and high differentiation from the teff A and B subgenomes. Raw PacBio  
367 data was error corrected and assembled using Canu (V1.4)<sup>52</sup> which produced accurate and  
368 contiguous assembly for homozygous plant genomes. The following parameters were modified:  
369 minReadLength=2000, GenomeSize=622Mb, minOverlapLength=1000. Assembly graphs were  
370 visualized after each iteration of Canu in Bandage<sup>53</sup> to assess complexities related to repetitive  
371 elements and homoeologous regions. The final Canu based PacBio assembly has a contig N50 of  
372 1.55 Mb across 1,344 contigs with a total assembly size of 576 Mb. The raw PacBio contigs  
373 were polished to remove residual errors with Pilon (V1.22)<sup>18</sup> using 73x coverage of Illumina  
374 paired-end 150 bp data. Illumina reads were quality-trimmed using Trimmomatic<sup>54</sup> followed by  
375 aligning to the assembly with bowtie2 (V2.3.0)<sup>55</sup> under default parameters. Parameters for Pilon  
376 were modified as follows: --flank 7, --K 49, and --mindepth 15. Pilon was run recursively three  
377 times using the modified corrected assembly after each round. Ten full-length fosmids  
378 (collectively spanning 351kb) were aligned to the final PacBio assembly to assess the quality.  
379 The fosmids exhibited an average identity of 99.9% to the PacBio assembly, with individual  
380 fosmids ranging from 99.3 to 100% nucleotide identity.

381

### 382 *Hi-C analysis and pseudomolecule construction*

383 The PacBio based teff contigs were anchored into a chromosome-scale assembly using a Hi-C  
384 proximity-based assembly approach as previously described<sup>19</sup>. A Hi-C library was constructed  
385 using 0.2 g of leaf tissue collected from newly emerged teff seedlings with the Proximo™ Hi-C  
386 Plant kit (Phase Genomics) following the manufacturer’s protocol. After verifying quality, the  
387 Hi-C library was size-selected for 300-600 bp fragments and sequenced on the Illumina HiSeq  
388 4000 under paired-end 150 bp mode. 150 bp reads were used to avoid erroneous alignment in  
389 highly similar homoeologous regions. In total, 226 million read pairs were used as input for the  
390 Juicer and 3d-DNA Hi-C analysis and scaffolding pipelines<sup>21,56</sup>. Illumina reads were quality-  
391 trimmed using Trimmomatic<sup>54</sup> and aligned to the contigs using BWA (V0.7.16)<sup>20</sup> with strict  
392 parameters (-n 0) to prevent mismatches and non-specific alignments in repetitive and  
393 homoeologous regions. Contigs were ordered and oriented and assembly errors were identified  
394 using the 3d-DNA pipeline with default parameters<sup>56</sup>. The resulting hic contact matrix was  
395 visualized using Juicebox, and misassemblies and misjoins were manually corrected based on  
396 neighboring interactions. This approach identified 20 high-confidence clusters representing the  
397 haploid chromosome number in Teff. The manually validated assembly was used to build  
398 pseudomolecules using the finalize-output.sh script from 3d-DNA and chromosomes were

399 renamed and ordered by size and binned to the A and B subgenomes based on centromeric array  
400 analysis (described in detail below).

401

#### 402 *Identification of repetitive elements*

403 We first identified and masked the simple sequence repeats in the teff genome with GMATA<sup>57</sup>,  
404 and then conducted structure-based full-length transposable element (TE) identification using the  
405 following bioinformatic tools: LTR\_FINDER<sup>58</sup> and LTRharvest<sup>59</sup> to find LTR-RTs,  
406 LTR\_retriever<sup>60</sup> to acquire high-confidence full LTR retrotransposons, SINE-Finder<sup>61</sup> to  
407 identify SINEs, MGEscan-nonLTR (V2)<sup>62</sup> to identify LINEs, MITE-Hunter<sup>63</sup> and MITE  
408 Tracker<sup>64</sup> to identify TIRs, and HelitronScanner<sup>65</sup> to identify *Helitrons*. All TEs were classified  
409 and manually checked according to the nomenclature system of transposons as described  
410 previously<sup>66</sup> and against Repbase to validate their annotation<sup>67</sup>. We used the newly identified  
411 TEs as a custom library to identify full length and truncated TE elements through a homology-  
412 based search with RepeatMasker (<http://www.repeatmasker.org>, version 4.0.7)<sup>68</sup> using the teff  
413 pseudomolecules as input. Parameters for RepeatMasker were as described previously<sup>69</sup>, and all  
414 other parameters were left as default. The distribution of repeat sequences was then calculated.  
415 Only LTR-RT families with at least 5 intact copies were used for analysis of subgenome  
416 specificity. Within the 65 families having > 5 intact elements, we identified LTRs with  
417 subgenomic specific activity. A family is considered as subgenomic specific if all intact elements  
418 of this family are from the same subgenome. Subgenome specificity was verified through  
419 BLAST of the element against the genome, and the distribution of matched sequences was  
420 manually inspected for subgenome specificity. The approximate insertion dates of LTR-RTs  
421 were calculated using the evolutionary distance between two LTR-RTs<sup>70,71</sup> with the formula of  
422  $T=K/2\mu$ , where K is the divergence rate approximated by percent identity and  $\mu$  is the neutral  
423 mutation rate estimated as  $\mu=1.3 \times 10^{-8}$  mutations per bp per year.

424 Centromeric repeat arrays were identified with the approach outlined in<sup>72</sup> using Tandem  
425 repeat finder (Version 4.07)<sup>73</sup>. Parameters were modified as follows for Tandem repeat finder:  
426 '1 1 2 80 5 200 2000 -d -h'. Centromere-specific repeats are often the most abundant tandem  
427 repeats in the genome, and they were identified in teff by the following criteria: (1) copy number,  
428 (2) sequence level conservation between chromosomes, (3) similarity to other grass repeats, and  
429 (4) proximity to centromere-specific *gypsy* LTR-RTs. This approach identified two distinct  
430 centromere-specific arrays (CenTA and CenTB) with a shared length of 159 bp yet distinct  
431 sequence compositions. The consensus sequence of centromeric repeats from each chromosome  
432 was used to construct a maximum likelihood phylogenetic tree implemented in MEGA5  
433 (V10.0.5)<sup>74</sup>. This approach separated centromeric repeats from the twenty chromosomes into  
434 two distinct groups corresponding to the A and B subgenomes.

435

#### 436 *Genome annotation*

437 Genes in the teff genome were annotated using the MAKER-P pipeline<sup>75</sup>. The LTR-RT repeat  
438 library from LTR retriever was used for repeat masking. Transcript-based evidence was  
439 generated using RNAseq data from the ten tissues of the teff expression atlas. Quality trimmed  
440 RNAseq reads were aligned to the unmasked teff genome using the splice aware alignment  
441 program STAR (v2.6)<sup>76</sup> and transcripts were identified using StringTie (v1.3.4)<sup>77</sup> with default  
442 parameters. The `-merge` flag was used to combine the output from individual libraries to  
443 generate a representative set of non-redundant transcripts. Protein sequences from the  
444 Arabidopsis<sup>78</sup>, rice<sup>79</sup>, and sorghum<sup>80</sup> genomes as well as proteins from the UniProtKB plant  
445 databases<sup>81</sup> were used as protein evidence. *Ab initio* gene prediction was conducted using SNAP<sup>82</sup>  
446 and Augustus (3.0.2)<sup>83</sup> with two rounds of iterative training. The resulting gene models were  
447 filtered to remove any residual repetitive elements using BLAST with a non-redundant  
448 transposase library. The annotation quality was assessed using the benchmarking universal  
449 single-copy orthologs (BUSCO; v.2)<sup>84</sup> with the plant-specific dataset (embryophyta\_odb9).

450

#### 451 *RNAseq expression analysis and homoeolog expression bias*

452 Gene expression levels were quantified with the pseudo-aligner Kallisto (v 0.44.0)<sup>85</sup> using the  
453 teff gene models as a reference. Paired-end Illumina reads from the ten tissues in the expression  
454 atlas were quality trimmed using Trimmomatic (V0.33) with default parameters and pseudo-  
455 aligned to the gene models with Kallisto under default parameters with 100 bootstraps per  
456 sample. The teff A and B subgenomes have high sequence divergence (~7%) such that  
457 misalignment between homoeologs was minimal. Expression levels were quantified as  
458 Transcripts Per Million (TPM) and the three biological replicates were averaged for direct  
459 homoeolog comparisons.

460

#### 461 *Comparative genomics*

462 Homoeologous gene pairs between the teff A and B subgenomes and syntenic gene pairs across  
463 select grasses were identified using the MCSCAN toolkit implemented in python  
464 ([https://github.com/tanghaibao/jcvi/wiki/MCscan-\(Python-version\)](https://github.com/tanghaibao/jcvi/wiki/MCscan-(Python-version))). Teff homoeologs were  
465 identified by all vs. all alignment using LAST, and hits were filtered using default parameters in  
466 MCSCAN with a minimum block size of 5 genes. This approach identified 23,303  
467 homoeologous, syntenic gene pairs between the A and B subgenome. Homoeologs gene pairs  
468 with translocations were not identified using this syntenic approach and were thus excluded from  
469 analysis. Tandem gene duplicates in teff were identified from the all vs. all LAST output with a  
470 maximum gene distance of 10. Gene models from teff were aligned to the *Oropetium thomaeum*  
471<sup>19,25</sup> and *Sorghum bicolor*<sup>80</sup> genes as outlined above for comparative genomics analyses across  
472 grasses. Macro and microsytentic dot plots, block depths, and karyotype comparisons were  
473 generated in python using scripts from MSCAN.

474 Ka and Ks values were computed using a set of custom scripts available on GitHub:  
475 [https://github.com/Aeyocca/ka\\_ks\\_pipe/](https://github.com/Aeyocca/ka_ks_pipe/). The homoeologous gene pair list from the teff

476 subgenomes and syntenic orthologs between teff and *Oropetium* were used as input and the  
477 protein sequences from each gene pair were aligned using MUSCLE v3.8.31<sup>86</sup>. PAL2NAL  
478 (v14)<sup>87</sup> was used to convert the peptide alignment to a nucleotide alignment and Ks values were  
479 computed between gene pairs using codeml from PAML (V4.9h)<sup>88</sup> with parameters specified in  
480 the control file found in the GitHub repository listed above.

481

#### 482 **Data availability**

483 The raw PacBio data, Illumina DNaseq, and RNAseq data are available from the National  
484 Center for Biotechnology Information Short Read Archive. RNAseq reads from the teff  
485 expression atlas were deposited to the National Center for Biotechnology Information Short  
486 Read Archive under bioproject PRJNA525065. The genome assembly and annotation for Tef is  
487 available from CoGe under genome ID: id50954.

488

#### 489 **Acknowledgments**

490 We are indebted to Tsegaye Dabi at the Salk Institute for Biological Studies for introducing us to  
491 this amazing plant, and for inspiring generations of plant biologists. We thank Elliott Meer for  
492 assistance with PacBio sequencing, and the Monsanto Genomics Team (Randy Kerstetter, Mitch  
493 Sudkamp, Phil Latreille, Zijin Du and Joe Zhou) for full length sequenced fosmids. We thank  
494 James Schnable for his helpful comments and suggestions on the manuscript. This work is  
495 supported by funding from the National Science Foundation (MCB-1817347 to R.V.),  
496 Department of Energy (DE-SC0012639 to T.C.M. and T.P.M.), and partial support from the Bill  
497 & Melinda Gates Foundation (T.C.M. and D.B.).

498



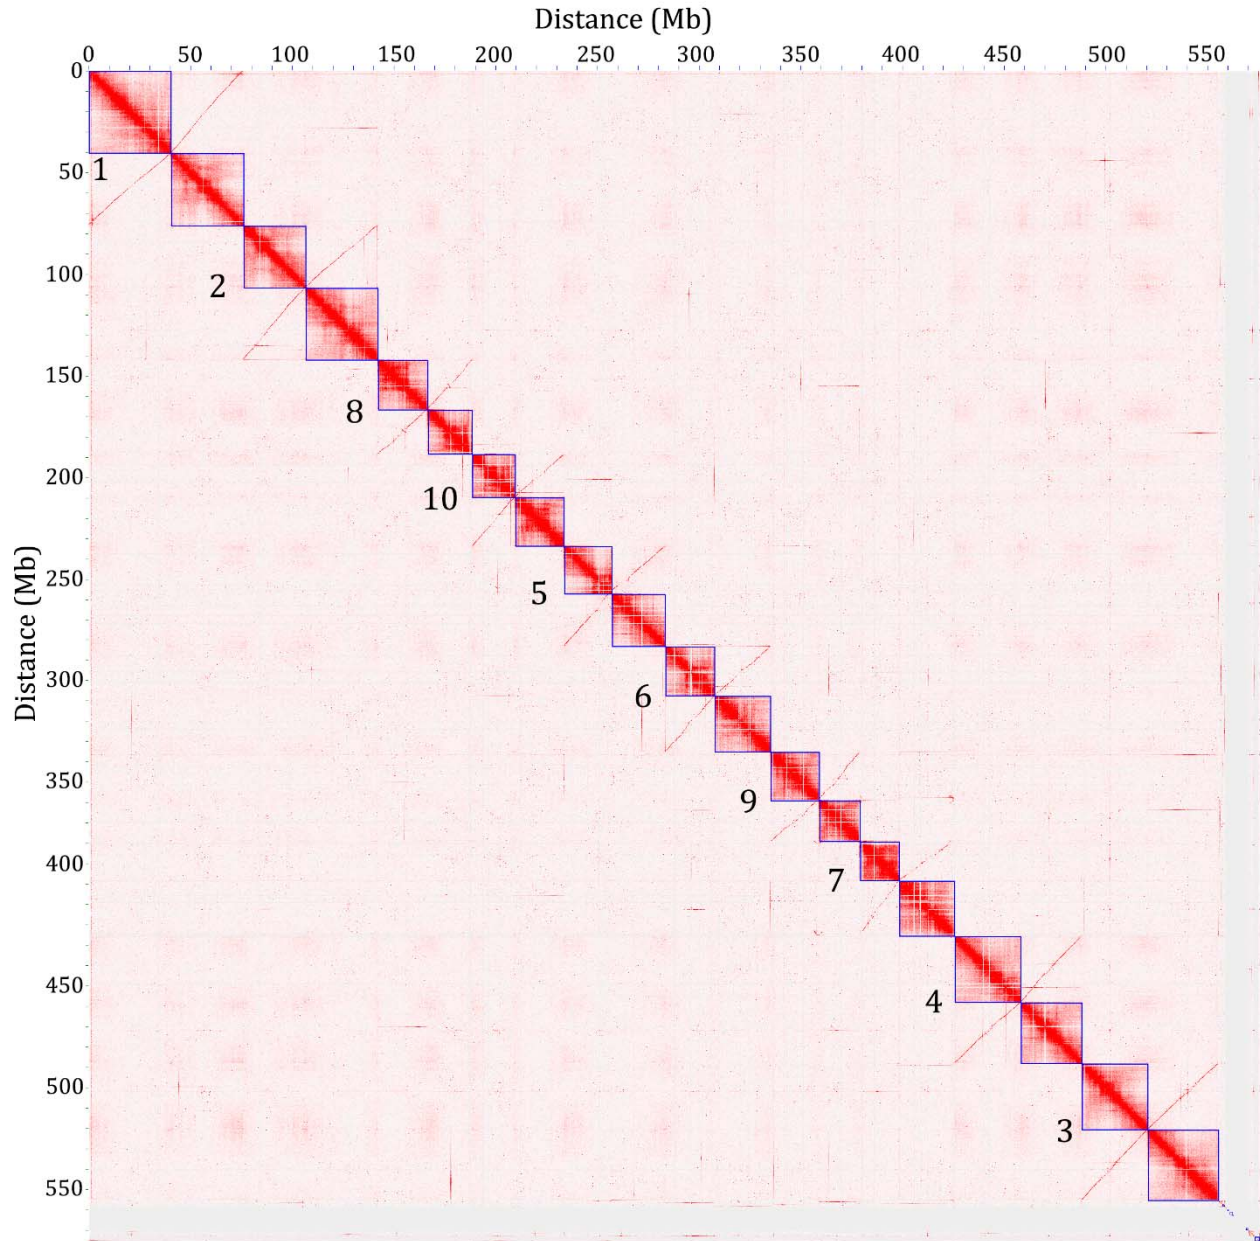

499

500 **Figure 1. Hi-C based clustering of the teff genome.** Heat map showing the density of Hi-C  
501 interactions between contigs with red indicating high density of interactions. Distinct  
502 chromosomes are highlighted by blue boxes and homoeologous chromosome pairs are  
503 numbered.

504

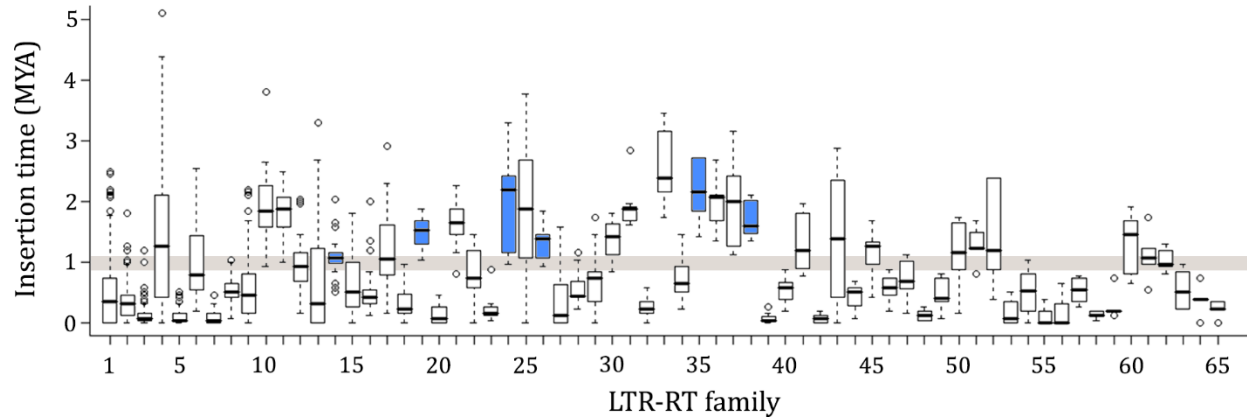

505

506 **Figure 2. Insertion dynamics of 65 LTR-RT families in teff.** Box plots of insertion time for  
507 the 65 LTR-RT families having  $\geq 5$  intact LTR elements are plotted. Families 1-5 have  $\geq 100$   
508 intact LTRs, 6-33 have  $\geq 10$  LTRs, and 34-65 have  $\geq 5$  LTRs. The six subgenome specific  
509 families are highlighted in blue and the estimated range for the teff polyploidy event is shown in  
510 brown. A substitution rate of  $1.3e-8$  per site per year was used to infer the element insertion  
511 times.

512

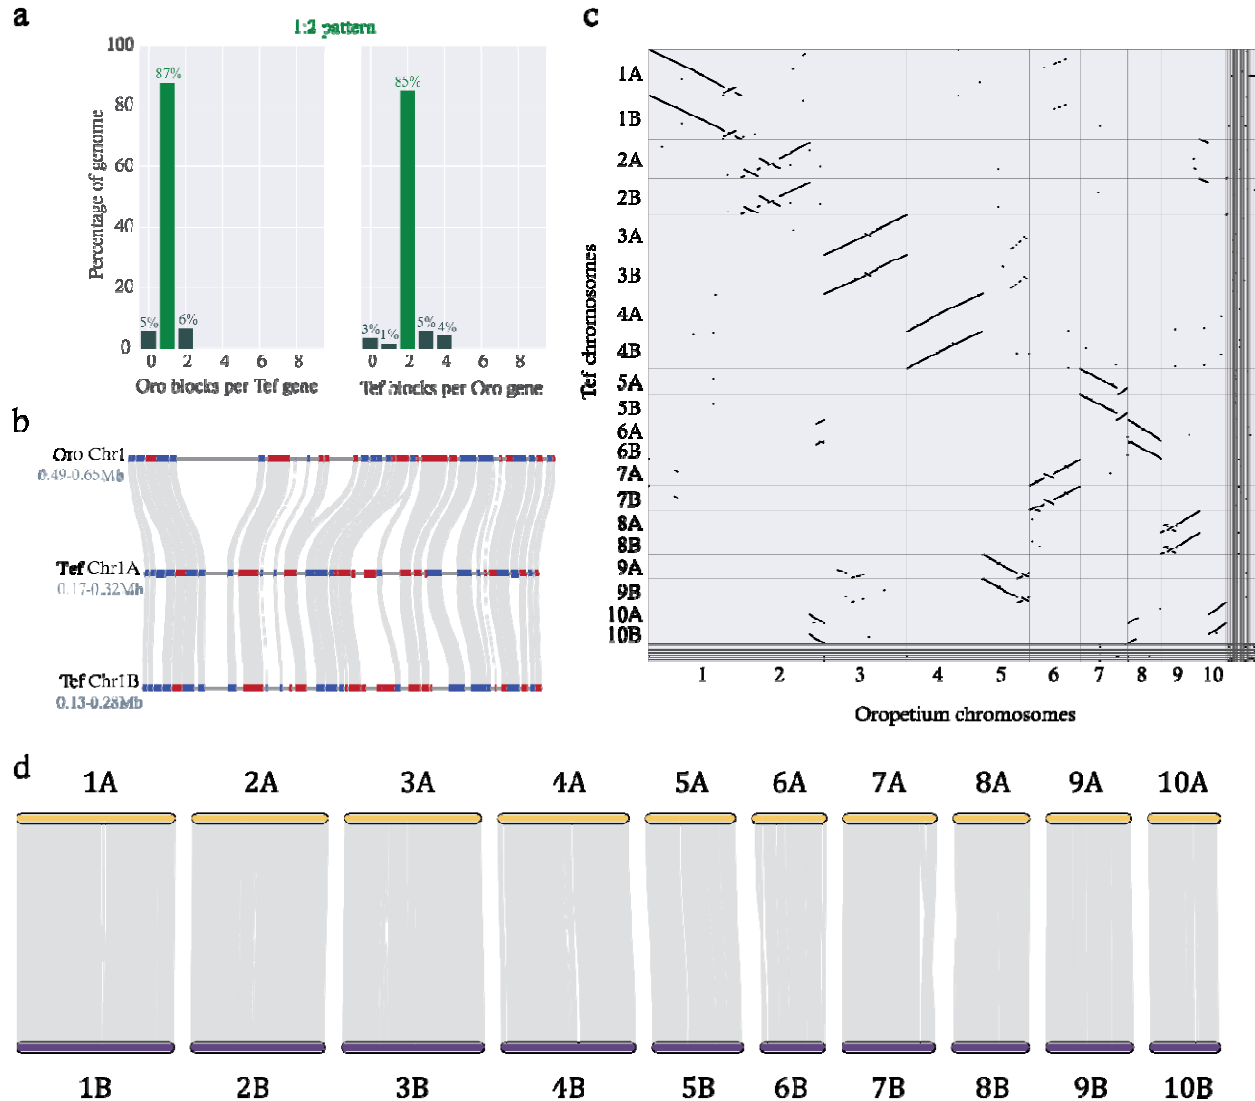

513

514 **Figure 3. Comparative genomics of the teff genome.** (a) Ratio of syntenic depth between  
 515 Oropetium and teff. Syntenic blocks of Oropetium per teff gene (left) and syntenic blocks of teff  
 516 per Oropetium gene (right) are shown indicating a clear 1:2 pattern of Oropetium to teff. (b)  
 517 Microsynteny of the teff and Oropetium genomes. A region of the Oropetium Chromosome 1  
 518 and the corresponding syntenic regions in homoeologous teff Chromosomes 1 A and B are  
 519 shown. Genes are shown in red and blue (for forward and reverse orientation respectively) and  
 520 syntenic gene pairs are connected by grey lines. (c) Macrosynteny of the teff and Oropetium  
 521 genomes. Syntenic gene pairs are denoted by gray points. (d) Collinearity of the teff subgenomes.  
 522 The ten chromosomes belonging to the teff A and B subgenomes are shown in yellow and purple  
 523 respectively. Syntenic blocks between homoeologous regions are shown in grey.

524

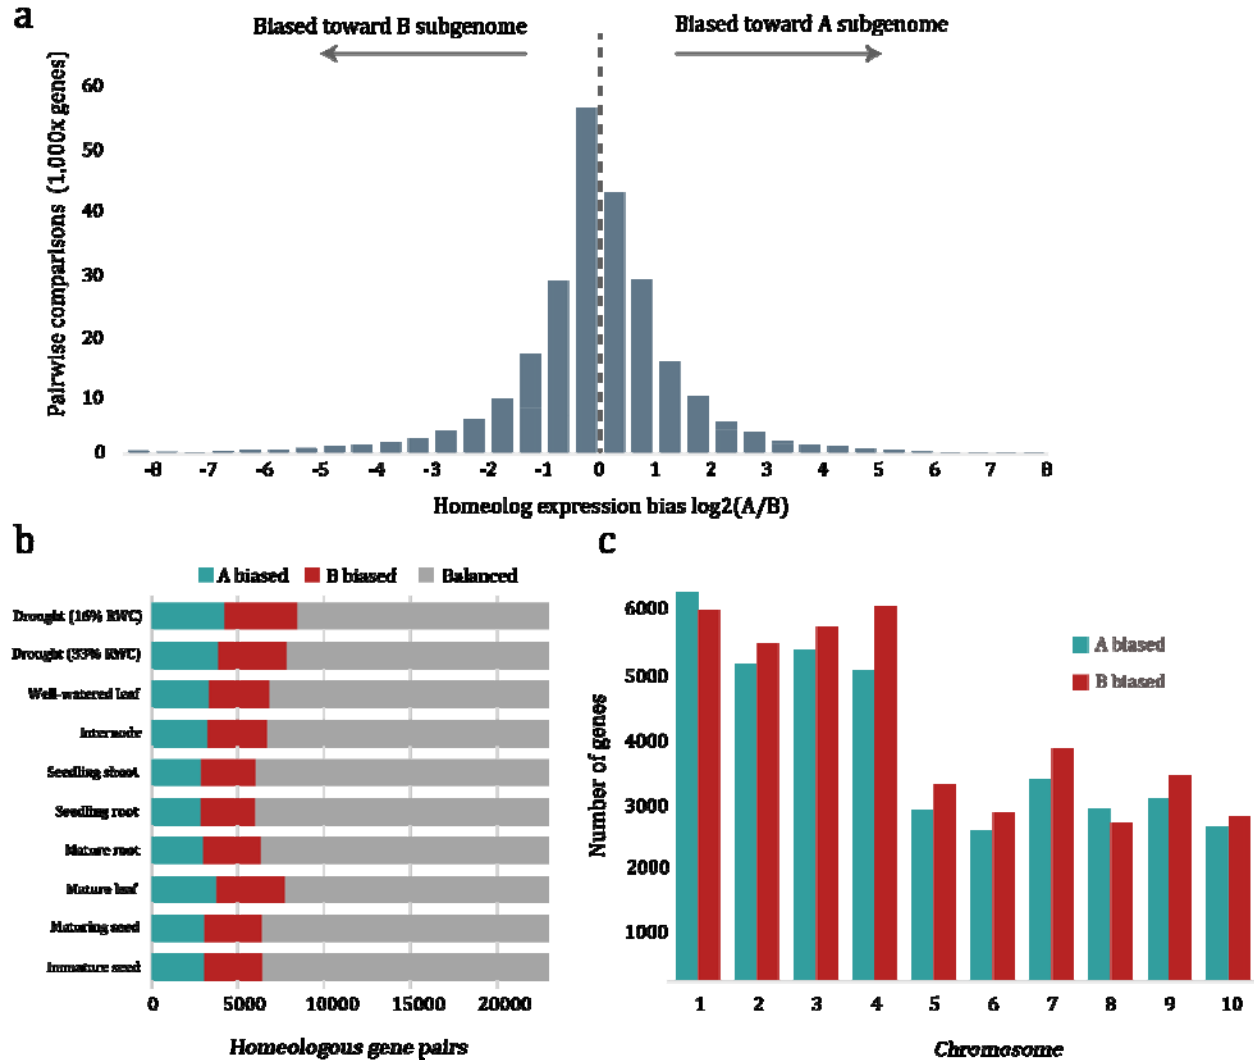

525

526 **Figure 4. Homoeolog expression bias between the A and B subgenomes of teff.** (a) The  
 527 distribution of homoeolog expression bias (HEB) between all gene pairs in all tissues. An HEB >  
 528 0 indicates bias toward the A subgenome and a HEB < 0 indicates bias toward the B subgenome.  
 529 (b) HEB across the ten tissues in the teff expression atlas. Gene pairs were classified as biased  
 530 toward the A (blue) or B (red) subgenomes or balanced with no statistically significant  
 531 differential expression (grey). (c) HEB in each of the ten pairs of chromosomes across all ten  
 532 tissue types.

533

534 **Table 1.** Summary statistics of the teff genome

| <b>Chromosome</b> | <b>Size (bp)</b>   | <b>Anchored contigs</b> | <b>Number of genes</b> | <b>Number of Tandem duplicates</b> |
|-------------------|--------------------|-------------------------|------------------------|------------------------------------|
| 1A                | 40,621,098         | 35                      | 5,135                  | 465                                |
| 1B                | 35,710,944         | 32                      | 4,829                  | 469                                |
| 2A                | 35,425,885         | 45                      | 4,398                  | 441                                |
| 2B                | 30,633,641         | 23                      | 4,112                  | 382                                |
| 3A                | 34,643,735         | 47                      | 4,415                  | 404                                |
| 3B                | 32,575,812         | 43                      | 4,370                  | 417                                |
| 4A                | 32,664,196         | 39                      | 4,224                  | 318                                |
| 4B                | 29,936,223         | 32                      | 4,127                  | 294                                |
| 5A                | 26,945,638         | 29                      | 2,899                  | 403                                |
| 5B                | 24,206,550         | 36                      | 2,785                  | 385                                |
| 6A                | 27,140,163         | 46                      | 2,409                  | 365                                |
| 6B                | 19,415,607         | 31                      | 1,992                  | 225                                |
| 7A                | 26,459,500         | 44                      | 3,006                  | 315                                |
| 7B                | 23,383,462         | 34                      | 2,843                  | 307                                |
| 8A                | 24,151,120         | 26                      | 2,464                  | 270                                |
| 8B                | 21,147,804         | 28                      | 2,373                  | 239                                |
| 9A                | 24,589,398         | 38                      | 2,736                  | 292                                |
| 9B                | 21,940,566         | 23                      | 2,673                  | 270                                |
| 10A               | 23,813,772         | 24                      | 2,346                  | 268                                |
| 10B               | 20,101,091         | 32                      | 2,151                  | 227                                |
| unanchored        | 22,232,506         | 657                     | 1,968                  | 130                                |
| <b>Total</b>      | <b>577,738,711</b> | <b>1,344</b>            | <b>68,255</b>          | <b>6,886</b>                       |

535

536



537 **References:**

538

- 539 1. Mueller, N.G., Fritz, G.J., Patton, P., Carmody, S. & Horton, E.T. Growing the lost crops of eastern  
540 North America's original agricultural system. *Nature plants* **3**, 17092 (2017).
- 541 2. Khoury, C.K. *et al.* Increasing homogeneity in global food supplies and the implications for food  
542 security. *Proceedings of the National Academy of Sciences* **111**, 4001-4006 (2014).
- 543 3. Costanza, S., Dewet, J. & Harlan, J.R. Literature review and numerical taxonomy of *Eragrostis tef*  
544 (*T'ef*). *Economic Botany* **33**, 413-424 (1979).
- 545 4. Demissie, A. *Tef* genetic resources in Ethiopia. in *Narrowing the Rift: Tef Research and*  
546 *Development. Proceedings of the International Workshop on Tef Genetics and Improvement,*  
547 *Debre Zeit, Ethiopia* 16-19 (2000).
- 548 5. D'Andrea, A.C. *T'ef* (*Eragrostis tef*) in ancient agricultural systems of highland Ethiopia. *Economic*  
549 *Botany* **62**, 547-566 (2008).
- 550 6. Abraham, B. *et al.* The system of crop intensification: reports from the field on improving  
551 agricultural production, food security, and resilience to climate change for multiple crops.  
552 *Agriculture & Food Security* **3**, 4 (2014).
- 553 7. Cannarozzi, G. *et al.* Genome and transcriptome sequencing identifies breeding targets in the  
554 orphan crop *tef* (*Eragrostis tef*). *BMC genomics* **15**, 581 (2014).
- 555 8. Gugsu, L. *et al.* The cytogenetics of *tef*. in *Narrowing the Rift: Tef Research and development.*  
556 *Proceedings of the International Workshop on Tef Genetics and Improvement held at Debre Zeit,*  
557 *Ethiopia* (2001).
- 558 9. Ingram, A.L. & Doyle, J.J. The origin and evolution of *Eragrostis tef* (Poaceae) and related  
559 polyploids: evidence from nuclear *waxy* and plastid *rps16*. *American Journal of Botany* **90**, 116-  
560 122 (2003).
- 561 10. Paterson, A.H. *et al.* Repeated polyploidization of *Gossypium* genomes and the evolution of  
562 spinnable cotton fibres. *Nature* **492**, 423 (2012).
- 563 11. Osborn, T.C. The contribution of polyploidy to variation in Brassica species. *Physiologia*  
564 *Plantarum* **121**, 531-536 (2004).
- 565 12. Ulrich, D. & Olbricht, K. Diversity of volatile patterns in sixteen *Fragaria vesca* L. accessions in  
566 comparison to cultivars of *Fragaria x ananassa*. *Journal of Applied Botany and Food Quality*  
567 **86**(2013).
- 568 13. Thomas, B.C., Pedersen, B. & Freeling, M. Following tetraploidy in an *Arabidopsis* ancestor,  
569 genes were removed preferentially from one homoeolog leaving clusters enriched in dose-  
570 sensitive genes. *Genome research* **16**, 934-946 (2006).
- 571 14. Freeling, M. *et al.* Fractionation mutagenesis and similar consequences of mechanisms removing  
572 dispensable or less-expressed DNA in plants. *Current opinion in plant biology* **15**, 131-139 (2012).
- 573 15. Edger, P.P. *et al.* Subgenome dominance in an interspecific hybrid, synthetic allopolyploid, and a  
574 140-year-old naturally established neo-allopolyploid monkeyflower. *The Plant Cell*, tpc.  
575 00010.2017 (2017).
- 576 16. Roodt, R. & Spies, J.J. Chromosome studies in the grass subfamily Chloridoideae. II. An analysis  
577 of polyploidy. *Taxon* **52**, 736-746 (2003).
- 578 17. Koren, S. *et al.* Canu: scalable and accurate long-read assembly via adaptive k-mer weighting and  
579 repeat separation. *Genome research* **27**, 722-736 (2017).
- 580 18. Walker, B.J. *et al.* Pilon: an integrated tool for comprehensive microbial variant detection and  
581 genome assembly improvement. *PLoS one* **9**, e112963 (2014).

- 582 19. VanBuren, R., Wai, C.M., Keilwagen, J. & Pardo, J. A chromosome-scale assembly of the model  
583 desiccation tolerant grass *Oropetium thomaeum*. *Plant Direct* **2**, e00096 (2018).
- 584 20. Li, H. Aligning sequence reads, clone sequences and assembly contigs with BWA-MEM. *arXiv*  
585 *preprint arXiv:1303.3997* (2013).
- 586 21. Durand, N.C. *et al.* Juicer provides a one-click system for analyzing loop-resolution Hi-C  
587 experiments. *Cell systems* **3**, 95-98 (2016).
- 588 22. Tavassoli, A. University of London (1986).
- 589 23. Doyle, J.J. & Egan, A.N. Dating the origins of polyploidy events. *New Phytologist* **186**, 73-85  
590 (2010).
- 591 24. SanMiguel, P., Gaut, B.S., Tikhonov, A., Nakajima, Y. & Bennetzen, J.L. The paleontology of  
592 intergene retrotransposons of maize. *Nature genetics* **20**, 43 (1998).
- 593 25. VanBuren, R. *et al.* Single-molecule sequencing of the desiccation-tolerant grass *Oropetium*  
594 *thomaeum*. *Nature* (2015).
- 595 26. Initiative, I.B. Genome sequencing and analysis of the model grass *Brachypodium distachyon*.  
596 *Nature* **463**, 763 (2010).
- 597 27. Cotton, J.L. *et al.* Resolving deep relationships of PACMAD grasses: a phylogenomic approach.  
598 *BMC plant biology* **15**, 178 (2015).
- 599 28. Hittalmani, S. *et al.* Genome and Transcriptome sequence of Finger millet (*Eleusine coracana* (L.)  
600 Gaertn.) provides insights into drought tolerance and nutraceutical properties. *BMC genomics*  
601 **18**, 465 (2017).
- 602 29. Schnable, J.C., Springer, N.M. & Freeling, M. Differentiation of the maize subgenomes by  
603 genome dominance and both ancient and ongoing gene loss. *Proceedings of the National*  
604 *Academy of Sciences* **108**, 4069-4074 (2011).
- 605 30. Wang, X. *et al.* The genome of the mesopolyploid crop species *Brassica rapa*. *Nature genetics* **43**,  
606 1035 (2011).
- 607 31. Li, A. *et al.* mRNA and small RNA transcriptomes reveal insights into dynamic homoeolog  
608 regulation of allopolyploid heterosis in nascent hexaploid wheat. *The Plant Cell*, tpc. 114.124388  
609 (2014).
- 610 32. Douglas, G.M. *et al.* Hybrid origins and the earliest stages of diploidization in the highly  
611 successful recent polyploid *Capsella bursa-pastoris*. *Proceedings of the National Academy of*  
612 *Sciences*, 201412277 (2015).
- 613 33. Sun, H. *et al.* Karyotype stability and unbiased fractionation in the paleo-allotetraploid *Cucurbita*  
614 genomes. *Molecular plant* **10**, 1293-1306 (2017).
- 615 34. Edger, P.P., McKain, M.R., Bird, K.A. & VanBuren, R. Subgenome assignment in allopolyploids:  
616 challenges and future directions. *Current opinion in plant biology* **42**, 76-80 (2018).
- 617 35. Ramírez-González, R. *et al.* The transcriptional landscape of polyploid wheat. *Science* **361**,  
618 eaar6089 (2018).
- 619 36. Buggs, R.J. *et al.* Tissue-specific silencing of homoeologs in natural populations of the recent  
620 allopolyploid *Tragopogon mirus*. *New Phytologist* **186**, 175-183 (2010).
- 621 37. Appels, R. *et al.* Shifting the limits in wheat research and breeding using a fully annotated  
622 reference genome. *Science* **361**, eaar7191 (2018).
- 623 38. Chalhoub, B. *et al.* Early allopolyploid evolution in the post-Neolithic *Brassica napus* oilseed  
624 genome. *Science* **345**, 950-953 (2014).
- 625 39. Edger, P.P. *et al.* Origin and evolution of the octoploid strawberry genome. *Nature Genetics*  
626 (2019).
- 627 40. Wang, M. *et al.* Reference genome sequences of two cultivated allotetraploid cottons,  
628 *Gossypium hirsutum* and *Gossypium barbadense*. *Nature genetics*, 1 (2018).
- 629 41. Zou, C. *et al.* The genome of broomcorn millet. *Nature Communications* **10**, 436 (2019).

- 630 42. Bai, G., Tefera, H., Ayele, M. & Nguyen, H. A genetic linkage map of tef [*Eragrostis tef* (Zucc.)  
631 Trotter] based on amplified fragment length polymorphism. *Theoretical and Applied Genetics*  
632 **99**, 599-604 (1999).
- 633 43. Yu, J.-K., Graznak, E., Breseghello, F., Tefera, H. & Sorrells, M.E. QTL mapping of agronomic traits  
634 in tef [*Eragrostis tef* (Zucc) Trotter]. *BMC plant biology* **7**, 30 (2007).
- 635 44. Gaeta, R.T. & Pires, J.C. Homoeologous recombination in allopolyploids: the polyploid ratchet.  
636 *New Phytologist* **186**, 18-28 (2010).
- 637 45. Mayrose, I. *et al.* Recently formed polyploid plants diversify at lower rates. *Science* **333**, 1257-  
638 1257 (2011).
- 639 46. Wendel, J.F. Genome evolution in polyploids. in *Plant molecular evolution* 225-249 (Springer,  
640 2000).
- 641 47. Riley, R. & Chapman, V. Genetic control of the cytologically diploid behaviour of hexaploid  
642 wheat. *Nature* **182**, 713 (1958).
- 643 48. Zhang, J. *et al.* Allele-defined genome of the autopolyploid sugarcane *Saccharum spontaneum* L.  
644 *Nature genetics* **50**, 1565 (2018).
- 645 49. Zhu, Q. *et al.* High throughput discovery of mutations in tef semi-dwarfing genes by next  
646 generation sequencing analysis. *Genetics, genetics*. 112.144436 (2012).
- 647 50. Zhang, H.B., Zhao, X., Ding, X., Paterson, A.H. & Wing, R.A. Preparation of megabase-size DNA  
648 from plant nuclei. *The Plant Journal* **7**, 175-184 (1995).
- 649 51. Arumuganathan, K. & Earle, E. Estimation of nuclear DNA content of plants by flow cytometry.  
650 *Plant molecular biology reporter* **9**, 229-241 (1991).
- 651 52. Koren, S. *et al.* Canu: scalable and accurate long-read assembly via adaptive k-mer weighting and  
652 repeat separation. *bioRxiv*, 071282 (2017).
- 653 53. Wick, R.R., Schultz, M.B., Zobel, J. & Holt, K.E. Bandage: interactive visualization of de novo  
654 genome assemblies. *Bioinformatics* **31**, 3350-3352 (2015).
- 655 54. Bolger, A.M., Lohse, M. & Usadel, B. Trimmomatic: a flexible trimmer for Illumina sequence  
656 data. *Bioinformatics*, btu170 (2014).
- 657 55. Langmead, B. & Salzberg, S.L. Fast gapped-read alignment with Bowtie 2. *Nature methods* **9**,  
658 357-359 (2012).
- 659 56. Dudchenko, O. *et al.* De novo assembly of the *Aedes aegypti* genome using Hi-C yields  
660 chromosome-length scaffolds. *Science* **356**, 92-95 (2017).
- 661 57. Wang, X. & Wang, L. GMATA: An Integrated Software Package for Genome-Scale SSR Mining,  
662 Marker Development and Viewing. *Frontiers in Plant Science* **7**(2016).
- 663 58. Xu, Z. & Wang, H. LTR\_FINDER: an efficient tool for the prediction of full-length LTR  
664 retrotransposons. *Nucleic Acids Res* **35**, W265-8 (2007).
- 665 59. Ellinghaus, D., Kurtz, S. & Willhoeft, U. LTRharvest, an efficient and flexible software for de novo  
666 detection of LTR retrotransposons. *BMC Bioinformatics* **9**, 18 (2008).
- 667 60. Ou, S. & Jiang, N. LTR\_retriever: A Highly Accurate and Sensitive Program for Identification of  
668 Long Terminal Repeat Retrotransposons. *Plant Physiol* **176**, 1410-1422 (2018).
- 669 61. Wenke, T. *et al.* Targeted identification of short interspersed nuclear element families shows  
670 their widespread existence and extreme heterogeneity in plant genomes. *Plant Cell* **23**, 3117-28  
671 (2011).
- 672 62. Rho, M. & Tang, H. MGEScan-non-LTR: computational identification and classification of  
673 autonomous non-LTR retrotransposons in eukaryotic genomes. *Nucleic Acids Res* **37**, e143  
674 (2009).
- 675 63. Han, Y. & Wessler, S.R. MITE-Hunter: a program for discovering miniature inverted-repeat  
676 transposable elements from genomic sequences. *Nucleic Acids Res* **38**, e199 (2010).

- 677 64. Crescente, J.M., Zavallo, D., Helguera, M. & Vanzetti, L.S. MITE Tracker: an accurate approach to  
678 identify miniature inverted-repeat transposable elements in large genomes. *BMC Bioinformatics*  
679 **19**, 348 (2018).
- 680 65. Xiong, W., He, L., Lai, J., Dooner, H.K. & Du, C. HelitronScanner uncovers a large overlooked  
681 cache of Helitron transposons in many plant genomes. *Proc Natl Acad Sci U S A* **111**, 10263-8  
682 (2014).
- 683 66. Wicker, T. *et al.* A unified classification system for eukaryotic transposable elements. *Nature*  
684 *Reviews Genetics* **8**, 973 (2007).
- 685 67. Bao, W., Kojima, K.K. & Kohany, O. Repbase Update, a database of repetitive elements in  
686 eukaryotic genomes. *Mob DNA* **6**, 11 (2015).
- 687 68. Tarailo-Graovac, M. & Chen, N. Using RepeatMasker to identify repetitive elements in genomic  
688 sequences. *Current protocols in bioinformatics*, 4.10. 1-4.10. 14 (2009).
- 689 69. Luo, M.-C. *et al.* Genome sequence of the progenitor of the wheat D genome *Aegilops tauschii*.  
690 *Nature* **551**, 498 (2017).
- 691 70. Dai, X. *et al.* Birth and Death of LTR-Retrotransposons in *Aegilops tauschii*. *Genetics* **210**, 1039-  
692 1051 (2018).
- 693 71. Ma, J. & Bennetzen, J.L. Rapid recent growth and divergence of rice nuclear genomes.  
694 *Proceedings of the National Academy of Sciences of the United States of America* **101**, 12404-  
695 12410 (2004).
- 696 72. Melters, D.P. *et al.* Comparative analysis of tandem repeats from hundreds of species reveals  
697 unique insights into centromere evolution. *Genome biology* **14**, R10 (2013).
- 698 73. Benson, G. Tandem repeats finder: a program to analyze DNA sequences. *Nucleic acids research*  
699 **27**, 573-580 (1999).
- 700 74. Tamura, K. *et al.* MEGA5: molecular evolutionary genetics analysis using maximum likelihood,  
701 evolutionary distance, and maximum parsimony methods. *Molecular biology and evolution* **28**,  
702 2731-2739 (2011).
- 703 75. Campbell, M.S. *et al.* MAKER-P: a tool kit for the rapid creation, management, and quality  
704 control of plant genome annotations. *Plant physiology* **164**, 513-524 (2014).
- 705 76. Dobin, A. *et al.* STAR: ultrafast universal RNA-seq aligner. *Bioinformatics* **29**, 15-21 (2013).
- 706 77. Pertea, M. *et al.* StringTie enables improved reconstruction of a transcriptome from RNA-seq  
707 reads. *Nature biotechnology* **33**, 290-295 (2015).
- 708 78. Lamesch, P. *et al.* The Arabidopsis Information Resource (TAIR): improved gene annotation and  
709 new tools. *Nucleic acids research* **40**, D1202-D1210 (2011).
- 710 79. Goff, S.A. *et al.* A draft sequence of the rice genome (*Oryza sativa* L. ssp. japonica). *Science* **296**,  
711 92-100 (2002).
- 712 80. Paterson, A.H. *et al.* The Sorghum bicolor genome and the diversification of grasses. *Nature* **457**,  
713 551 (2009).
- 714 81. Boutet, E., Lieberherr, D., Tognolli, M., Schneider, M. & Bairoch, A. Uniprotkb/swiss-prot. in  
715 *Plant bioinformatics* 89-112 (Springer, 2007).
- 716 82. Korf, I. Gene finding in novel genomes. *BMC bioinformatics* **5**, 59 (2004).
- 717 83. Stanke, M. & Waack, S. Gene prediction with a hidden Markov model and a new intron  
718 submodel. *Bioinformatics* **19**, ii215-ii225 (2003).
- 719 84. Simão, F.A., Waterhouse, R.M., Ioannidis, P., Kriventseva, E.V. & Zdobnov, E.M. BUSCO:  
720 assessing genome assembly and annotation completeness with single-copy orthologs.  
721 *Bioinformatics* **31**, 3210-3212 (2015).
- 722 85. Bray, N.L., Pimentel, H., Melsted, P. & Pachter, L. Near-optimal probabilistic RNA-seq  
723 quantification. *Nature biotechnology* **34**, 525 (2016).

- 724 86. Edgar, R.C. MUSCLE: multiple sequence alignment with high accuracy and high throughput.  
725 *Nucleic acids research* **32**, 1792-1797 (2004).  
726 87. Suyama, M., Torrents, D. & Bork, P. PAL2NAL: robust conversion of protein sequence alignments  
727 into the corresponding codon alignments. *Nucleic acids research* **34**, W609-W612 (2006).  
728 88. Yang, Z. PAML: a program package for phylogenetic analysis by maximum likelihood.  
729 *Bioinformatics* **13**, 555-556 (1997).  
730
